# Supplementary material
Source: publisher site journal article supplement (http://e-cmh.org/upload/media/cmh-2023-0076-Supplementary-Table-4.pdf)
Supplement: Supplementary file 1 [file cmh-2023-0076-Supplementary-Table-4.pdf]

**Supplementary Table 4.** Treatment-related adverse events

| Adverse events                             | TARE (n=124) | TKI (n=92) | P-value |
|--------------------------------------------|--------------|------------|---------|
| Ascites of grade 2 or higher               | 8 (6.5)      | 22 (23.9)  | <0.001  |
| Variceal bleeding                          | 1 (0.8)      | 4 (4.3)    | 0.09    |
| Hepatic encephalopathy                     | 3 (2.4)      | 16 (17.4)  | <0.001  |
| Increased Child–Pugh score by 2 or greater | 12 (9.7)     | 33 (35.9)  | <0.001  |
| Radiation pneumonitis                      | 2 (1.6)      | -          | -       |
| REILD                                      | 6 (4.8)      | -          | -       |

The data are expressed as number (%).

REILD, radioembolization-induced liver disease; TARE, transarterial radioembolization; TKI, tyrosine kinase inhibitor.
